# Supplementary material for: Identification of TNFR2 and IL-33 as therapeutic targets in localized fibrosis
Source: PubMed Central journal article supplement — Sci Adv. 2019 Dec 4;5(12):eaay0370. doi: 10.1126/sciadv.aay0370 (PMC6892635; doi:10.1126/sciadv.aay0370), 2019-12-04
Supplement: aay0370_SM.pdf [file aay0370_SM.pdf]

## Supplementary Materials for

### Identification of TNFR2 and IL-33 as therapeutic targets in localized fibrosis

David Izadi, Thomas B. Layton, Lynn Williams, Fiona McCann, Marisa Cabrita, Ana I. Espirito Santo, Weilin Xie, Marco Fritzsche, Huw Colin-York, Marc Feldmann, Kim S. Midwood, Jagdeep Nanchahal\*

\*Corresponding author. Email: jagdeep.nanchahal@kennedy.ox.ac.uk

Published 4 December 2019, *Sci. Adv.* **5**, eaay0370 (2019)

DOI: 10.1126/sciadv.aay0370

#### This PDF file includes:

- Fig. S1. DD is a localized inflammatory disorder.
- Fig. S2. Single-cell RNA-seq of immune cells from freshly isolated Dupuytren's nodules.
- Fig. S3. Mast cells and M2 macrophages are the predominant sources of TNF in DD.
- Fig. S4. TNF induced protein expression and TNF receptor expression in Dupuytren's cord.
- Fig. S5. IL-33 and its receptor ST2 are expressed on Dupuytren's myofibroblasts.
- Fig. S6. No reduction in cell viability following treatment with neutralizing antibodies.
- Fig. S7. siRNA knockdown validation for *TNFRSF1A*, *TNFRSF1A*, and *ST2*.
- Fig. S8. IL-33 and TNF stromal-immune cell cross-talk in DD.

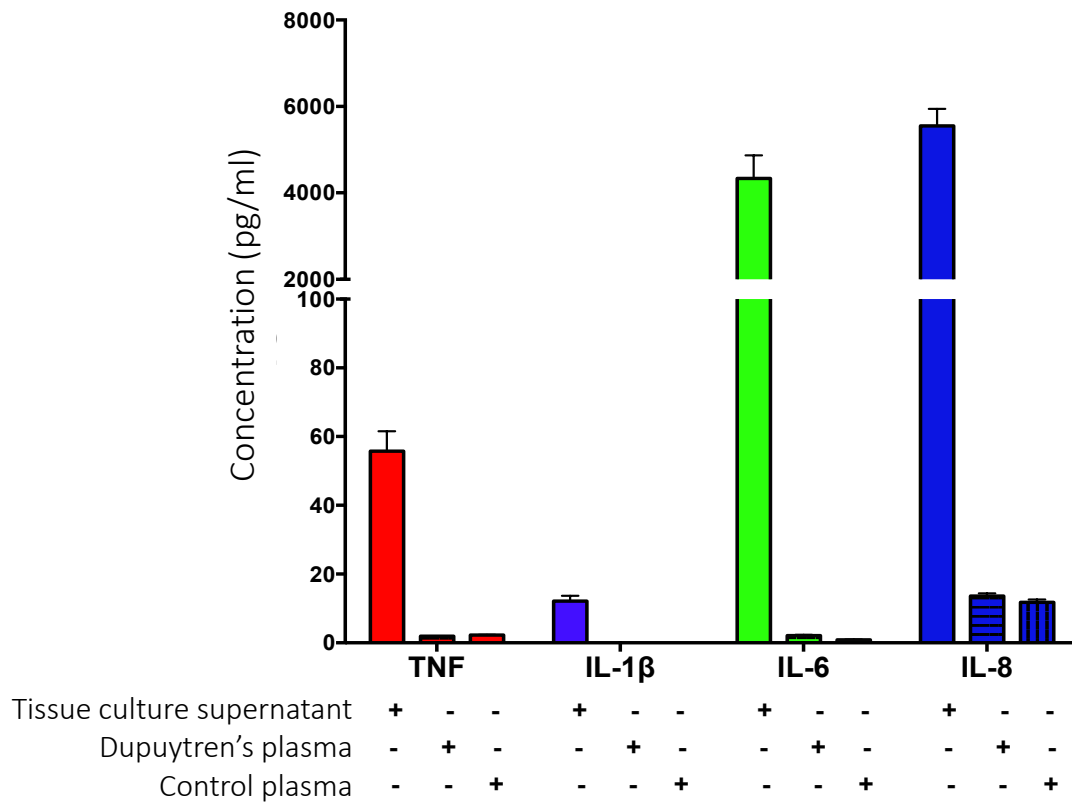

**Fig. S1. DD is a localized inflammatory disorder.** Bar plot of cytokines in plasma of DD patients compared to levels in freshly disaggregated nodular cells (tissue culture supernatant) and plasma from individuals (control plasma) not affected by DD ( $n = 35$  independent donors).

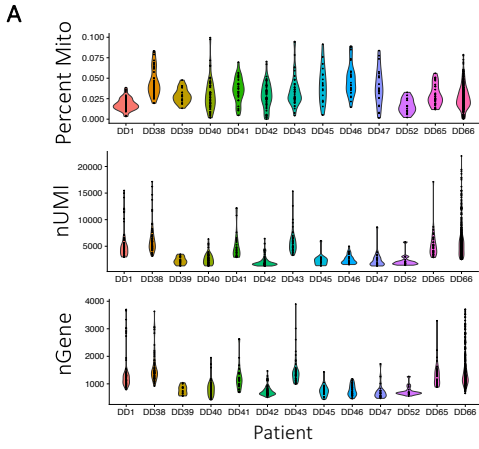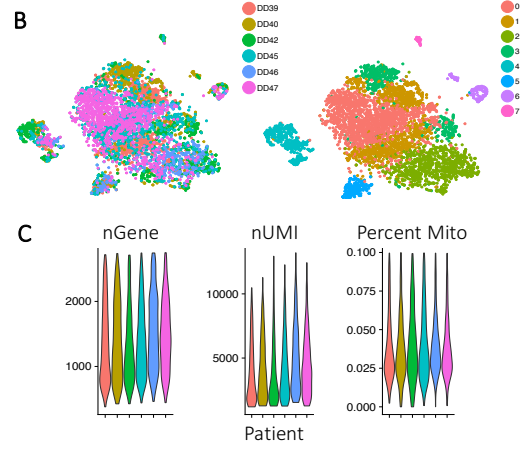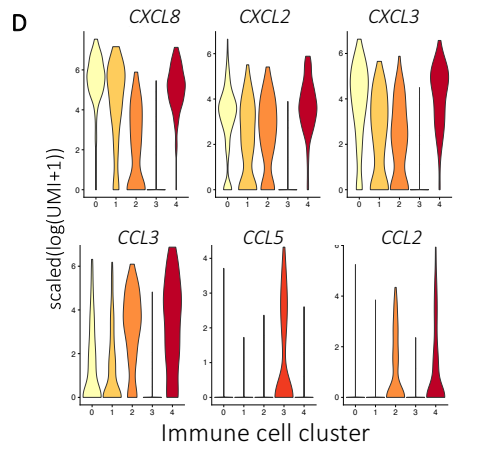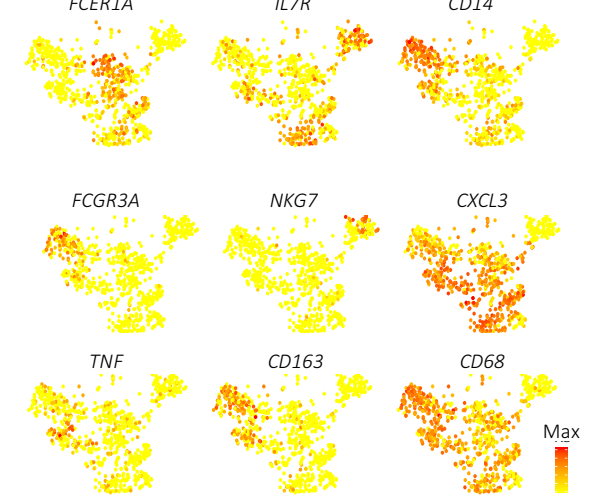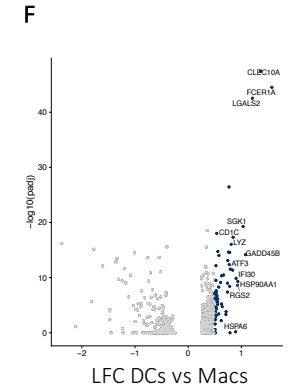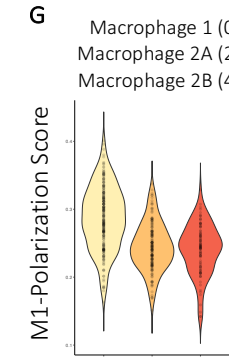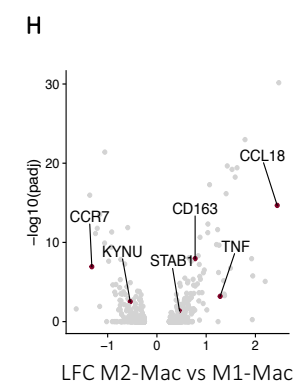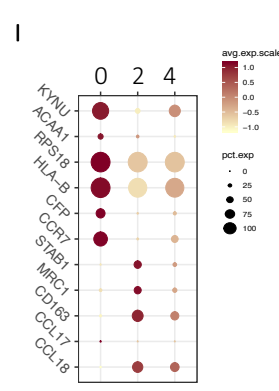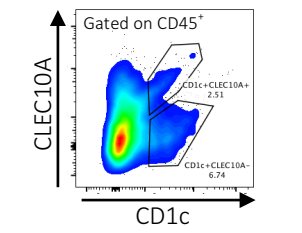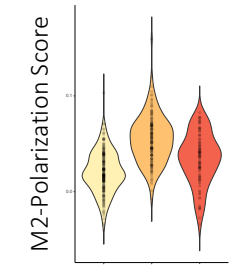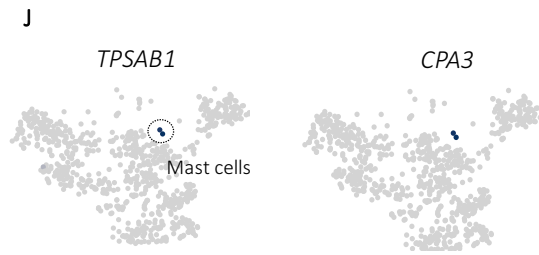

**Fig. S2. Single-cell RNA-seq of immune cells from freshly isolated Dupuytren's nodules.** (A) Violin plots showing quality control metrics for single-cell RNA-seq of immune cells in DD nodules ( $n = 12$  DD patients,  $k = 1,033$  cells). (B) tSNE embeddings of single cell RNA-seq of nodular cells coloured by patient donor (DD39-DD47) and Louvain cluster (0-7). (C) Violin plots showing quality control metrics for each DD patient ( $n = 6$  DD patients,  $k = 7,332$  cells). (D) Violin plots showing chemokine gene expression in scaled( $\log(\text{UMI}+1)$ ) in immune clusters. (E) tSNE embeddings of immune cells in DD nodules showing cell marker gene expression in scaled( $\log(\text{UMI}+1)$ ). (F) Top panel: Volcano plot showing differentially expressed genes (Wilcoxon Rank Sum test) between dendritic cell cluster and myeloid clusters. FDR-corrected (BH correction) p-value. Bottom panel; Representative density plots of flow cytometry analysis showing  $\text{CD45}^+\text{CD1C}^+\text{CLEC10A}^{+/-}$  immune cells in freshly disaggregated DD nodules. (G) Violin plot for 'M1 and M2-macrophage polarization score' in three macrophage clusters. This score represents the scaled average expression of the test gene sets ( $n = 198$  and  $n = 462$  genes). (H) Volcano plot showing differentially expressed genes (Wilcoxon Rank Sum test) between M2-macrophage (2A-B) clusters and M1-macrophage cluster. FDR-corrected (BH correction) p-value. (I) Dot plot showing gene expression in macrophage clusters in scaled( $\log(\text{UMI}+1)$ ). Pct.exp = percentage of cells expressing gene. (J) tSNE embeddings of immune cells showing expression of mast cell marker genes in scaled( $\log(\text{UMI}+1)$ ). Two mast cells highlighted.



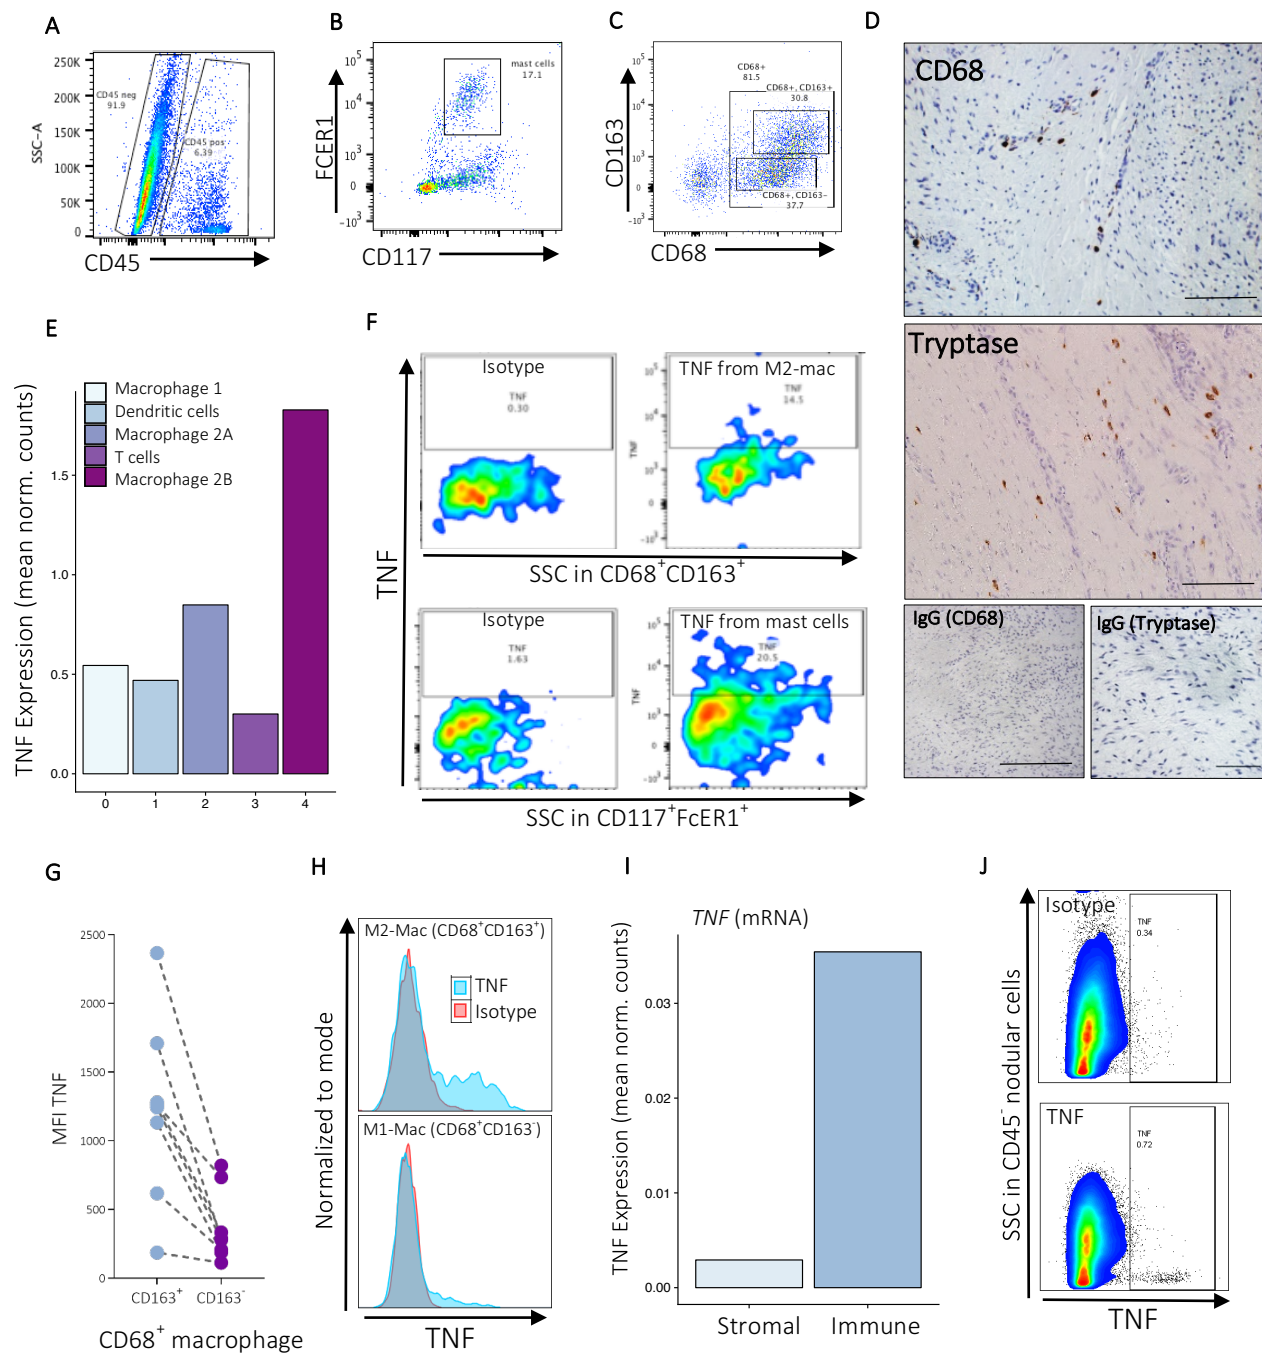

**Fig. S3. Mast cells and M2 macrophages are the predominant sources of TNF in DD.** (A) Scatter plot of flow cytometry gating strategy on CD45<sup>+</sup> in freshly isolated nodular cells ( $n = 5$  DD patients). (B) Scatter plot of flow cytometry gating strategy on CD45<sup>+</sup>FCER1<sup>+</sup>CD117<sup>+</sup> mast cells in DD nodules. (C) Scatter plot of flow cytometry gating strategy on CD45<sup>+</sup>CD68<sup>+</sup>CD163<sup>+/-</sup> macrophages in freshly isolated nodular cells. (D) Representative images of immunohistochemistry for tryptase<sup>+</sup> mast cells and CD68<sup>+</sup> macrophages in DD nodules, with isotype control. Scale bar = 40  $\mu\text{m}$  (top two panels) and 20  $\mu\text{m}$  (bottom two panels). (E) Bar plot of *TNF* gene expression in immune cell clusters in single cell RNA-seq. Expression in average normalized counts per cell cluster. (F) Representative density plots of flow cytometry analysis showing TNF expression in mast cells and macrophages ( $n = 5$  DD patients). (G) Line plot of flow cytometry analysis showing TNF expression (MFI) in CD163<sup>+</sup> and CD163<sup>-</sup> macrophages ( $n = 7$  DD patients). (H) Representative histograms of flow cytometry analysis for TNF expression in CD163<sup>-</sup> and CD163<sup>+</sup> macrophages in freshly disaggregated nodules with isotype control ( $n = 5$  DD patients). (I) Bar plot of *TNF* gene expression in stromal cells and immune cells in single cell RNA-seq. Expression in average normalized counts per cluster. (J) Representative density plots of flow cytometry analysis showing TNF expression in CD45<sup>-</sup> stromal cells in freshly disaggregated nodules with isotype control ( $n = 6$  DD patients).

**A**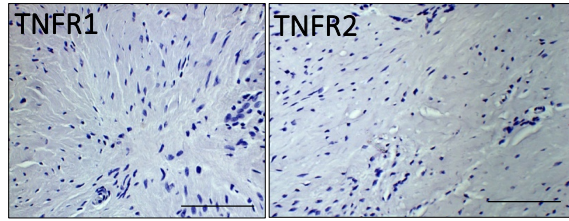**B**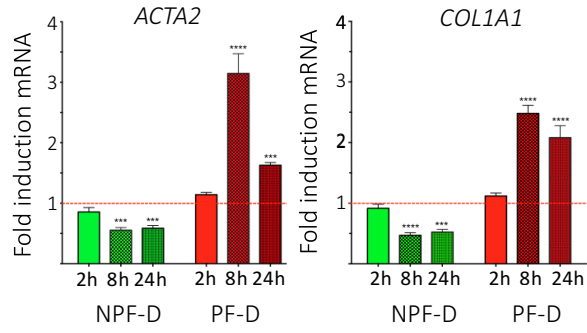**D**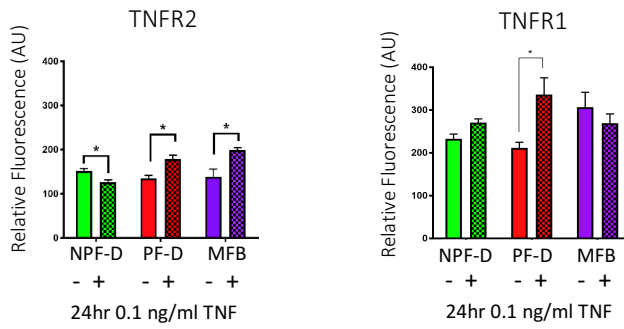**C**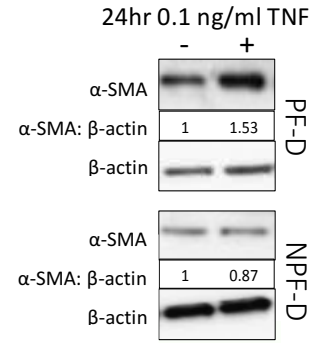**E**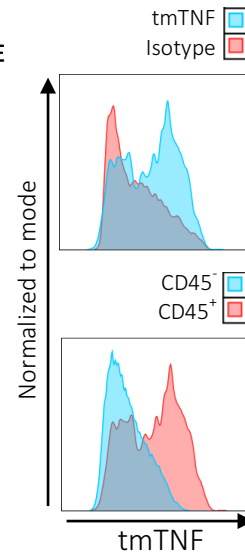

**Fig. S4. TNF induced protein expression and TNF receptor expression in Dupuytren's cord. (A)**

Representative images of immunohistochemistry for TNFR1 and TNFR2 expression in Dupuytren's cord.

Scale bar = 20  $\mu$ m. **(B)** Bar plots of *ACTA2* and *COL1A1* gene expression in palmar (PF-D) and non-

palmar (NPF-D) dermal fibroblasts from DD patients treated with 0.1 ng/ml rTNF at 2, 8 and 24 hours

(h). ( $n = 5$  DD patients, mean  $\pm$  SEM). **(C)** Western blot analysis showing  $\alpha$ -SMA protein expression in

NPF-D and PF-D on treatment with 0.1 ng/ml rTNF. **(D)** Bar plots of quantitative immunofluorescence

for TNFR1 and TNFR2 protein expression in non-palmar (NPDF) and palmar (PDF) dermal fibroblasts

and myofibroblasts from DD patients on treatment with 0.1 ng/ml rTNF ( $n = 5$  DD patients, mean  $\pm$

SEM). **(E)** Representative histogram plots of flow cytometry analysis for transmembrane TNF expression

in freshly disaggregated DD nodular cells ( $n = 4$  DD patients). \* $P < 0.05$ , \*\* $P < 0.01$ , \*\*\* $P < 0.001$ ,

\*\*\*\* $P < 0.0001$ .

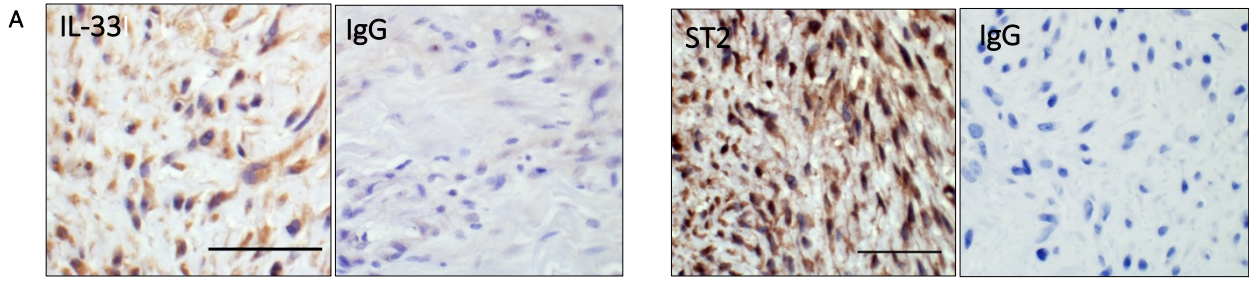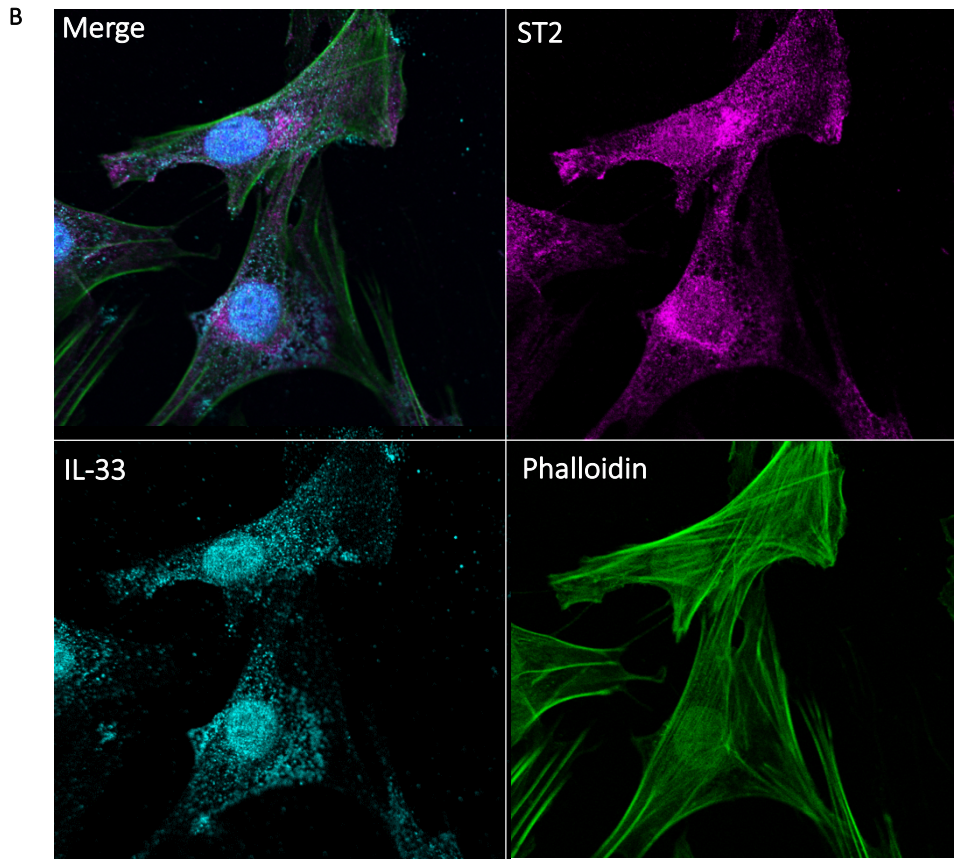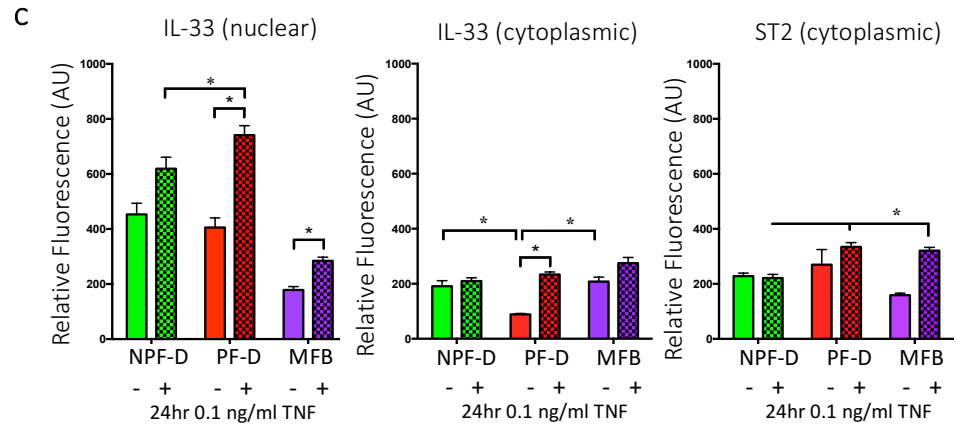

**Fig. S5. IL-33 and its receptor ST2 are expressed on Dupuytren's myofibroblasts.** (A) Representative images of immunohistochemistry for IL-33 and the receptor ST2 expression with corresponding isotype controls in DD nodules. Scale bar = 20  $\mu\text{m}$ . (B) Representative confocal images of immunofluorescence for ST2 and IL-33 in freshly isolated myofibroblasts from DD nodules. Scale bar = 10  $\mu\text{m}$ . (C) Bar plots of quantitative immunofluorescence showing cytoplasmic and nuclear IL-33 staining and ST2 cytoplasmic staining in non-palmar (NPDF) and palmar (PDF) dermal fibroblasts and myofibroblasts from DD patients on treatment with 0.1 ng/ml rTNF ( $n = 5$  DD patients, mean  $\pm$  SEM).

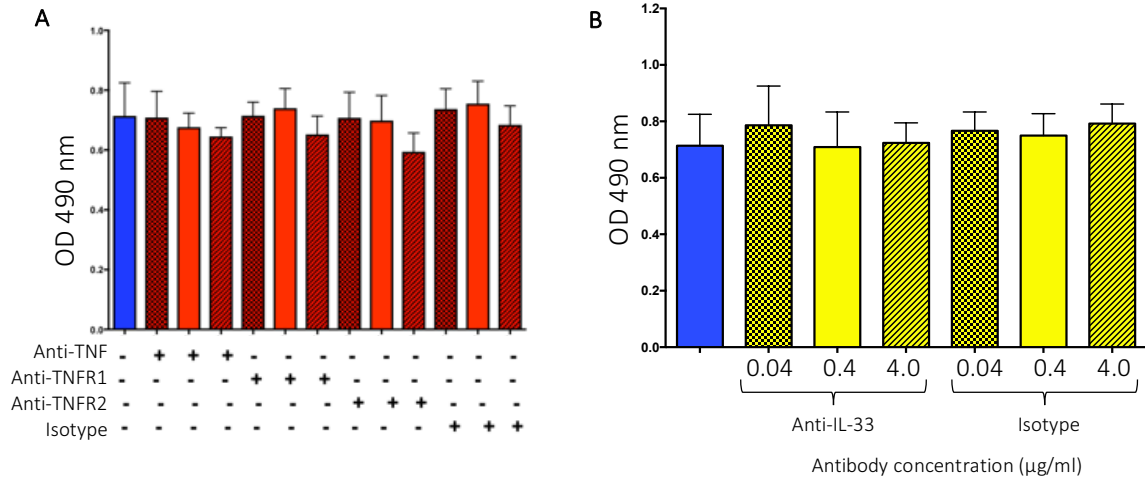

**Fig. S6. No reduction in cell viability following treatment with neutralizing antibodies.** (A) Bar plot of MTS cell viability assay of myofibroblasts treated over 24 hours with 1, 10 and 100 µg/ml of neutralizing anti-TNF, anti-TNFR1, anti-TNFR2 antibodies and isotype control. ( $n = 3$  DD patients, in triplicate, mean  $\pm$  SEM). (B) Bar plot of MTS cell viability assay of myofibroblasts treated over 24 hours with 0.04, 0.4 and 4 µg/ml of neutralizing anti-IL-33 and isotype control. ( $n = 3$  DD patients, in triplicate, mean  $\pm$  SEM). OD = Optical density.

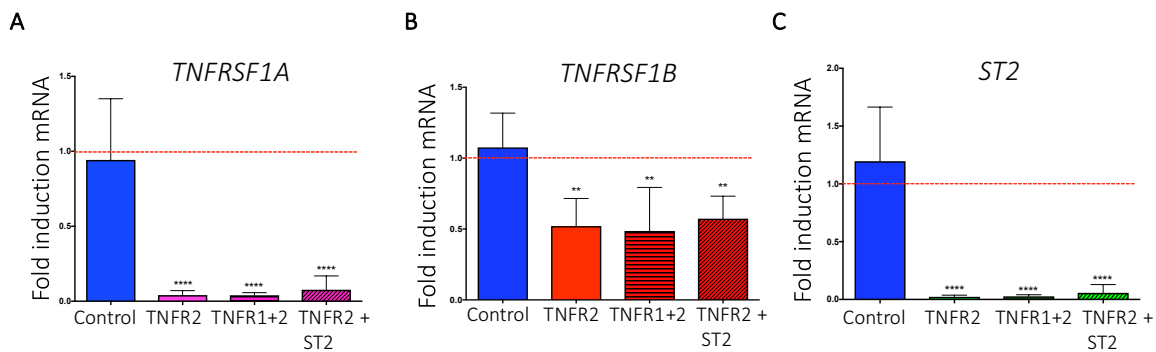

**Fig. S7. siRNA knockdown validation for *TNFRSF1A*, *TNFRSF1A*, and *ST2*.** (A-C) Bar plots of qPCR analysis showing gene expression of labelled genes following siRNA mediated knockdowns. ( $n = 3$  DD patients, in triplicate, mean  $\pm$  SEM).  $P < 0.05$ ,  $**P < 0.01$ ,  $***P < 0.001$ ,  $****P < 0.0001$ .

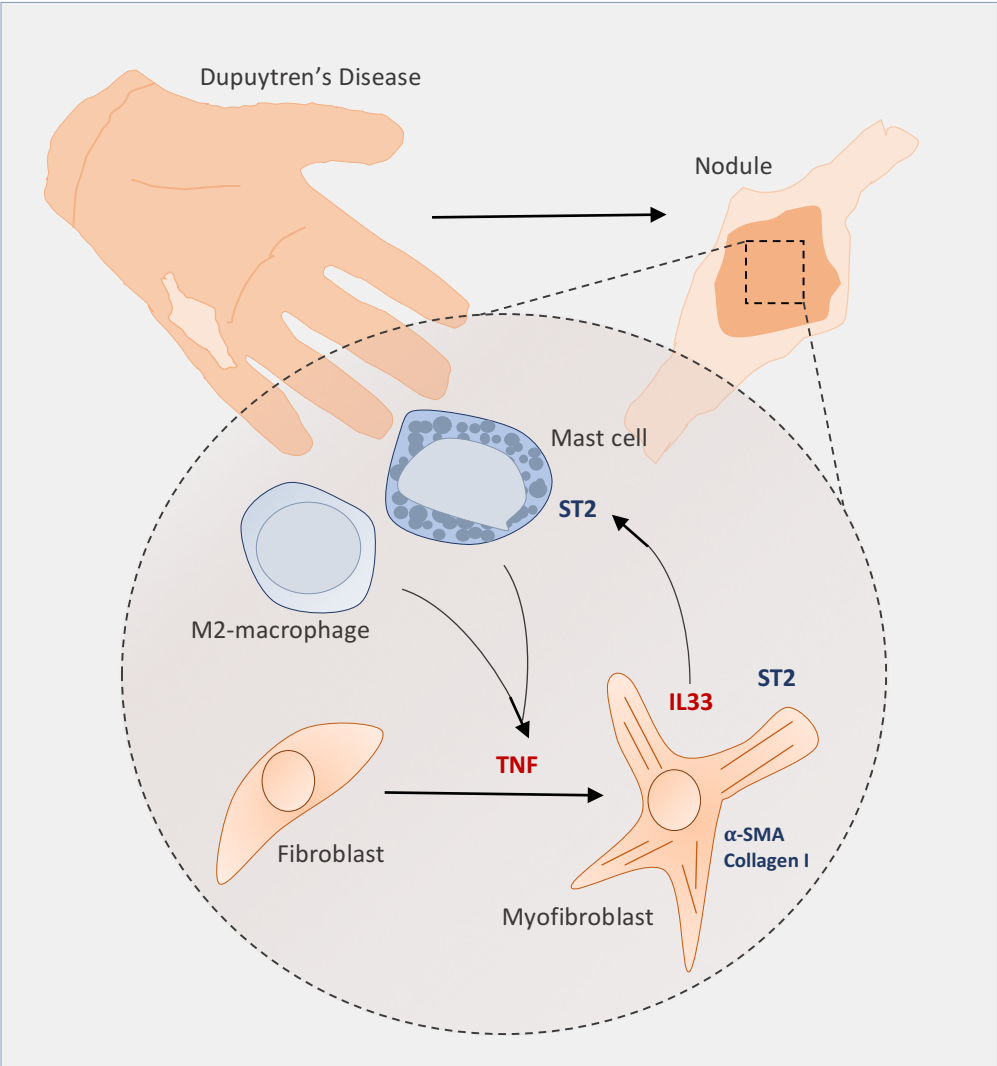



**Fig. S8. IL-33 and TNF stromal-immune cell cross-talk in DD.** Schematic illustrating that immune cells (mast cells and M2-macrophages) are the predominant source of TNF in DD that stimulates the development of the myofibroblast phenotype. Myofibroblasts are a significant source of IL-33 which further activates TNF secretion from immune cells.
